# Supplementary figures and images for: Projection to latent correlative structures, a dimension reduction strategy for spectral-based classification
Source: Royal Society of Chemistry journal article supplement (doi:10.1039/d1ra03359j), 2021-01-01

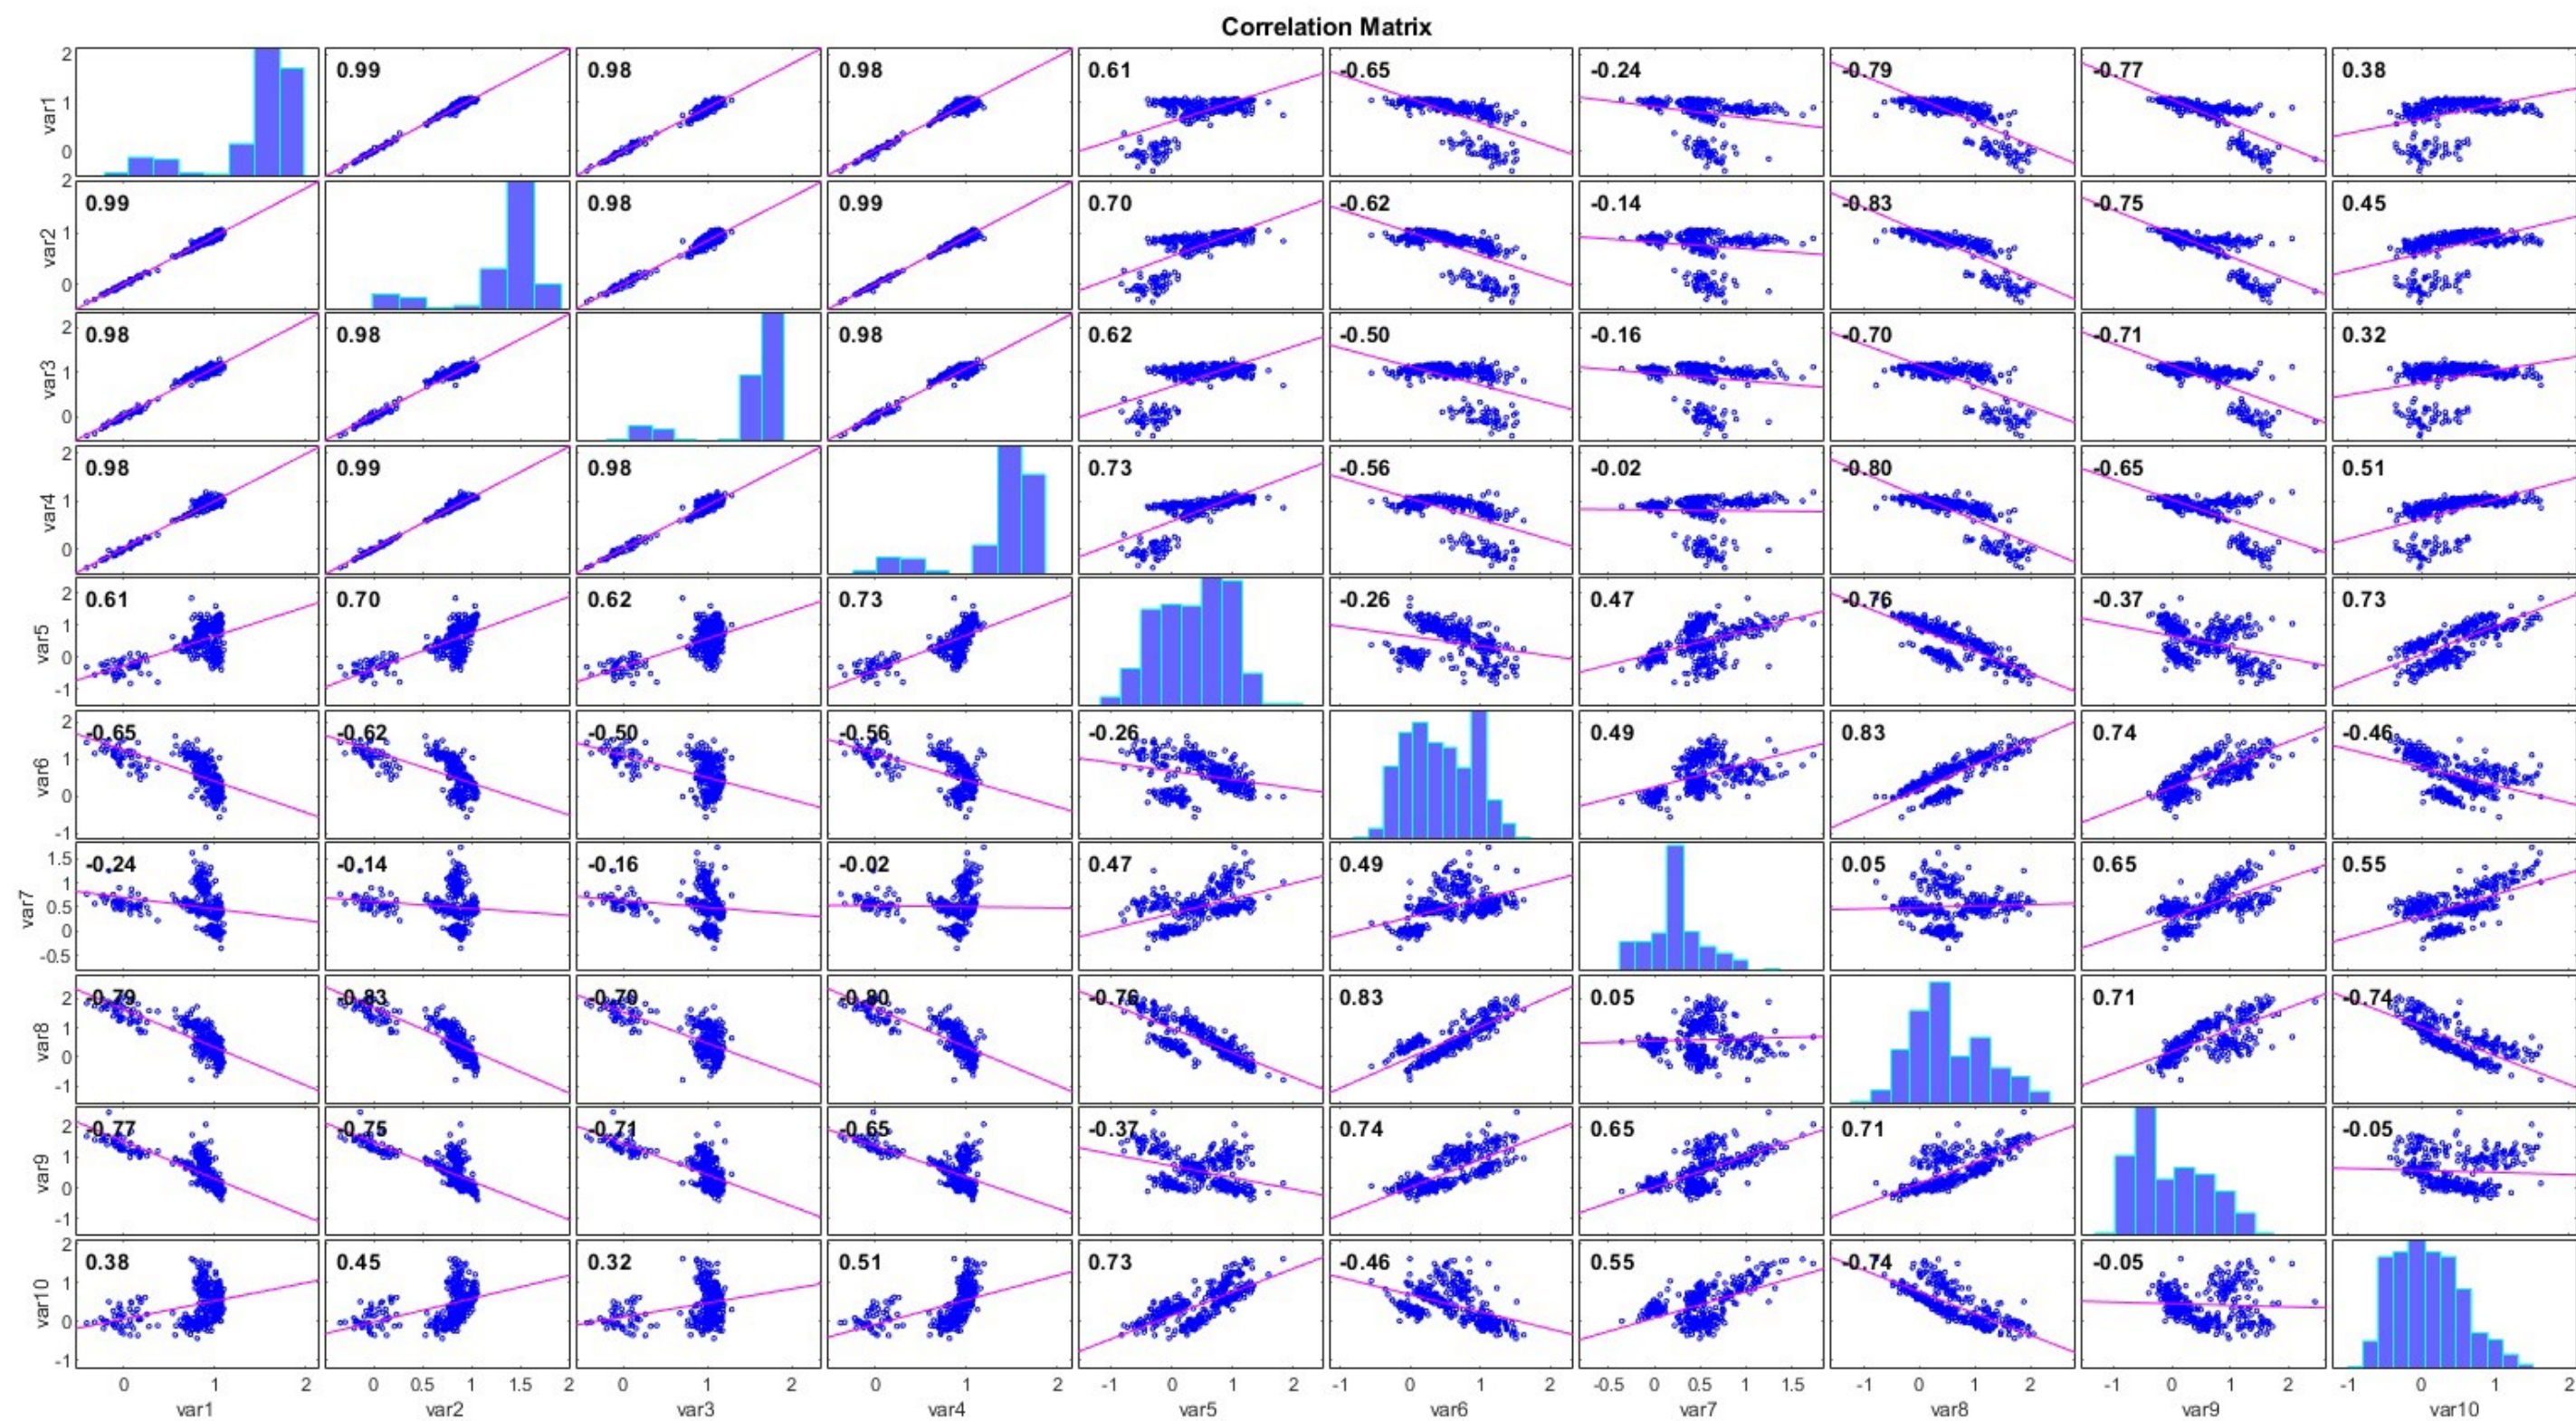

Supplement: d1ra03359j1.pdf [file d1ra03359j1.pdf]
